# Supplementary material for: A selective and discriminating noncyclic receptor for HSO4− ion recognition
Source: Royal Society of Chemistry journal article supplement (doi:10.1039/c3ra47935h), 2014-01-01
Supplement: c3ra47935h1.pdf [file c3ra47935h1.pdf]

## Supporting Information

### A selective and discriminating noncyclic receptor for $\text{HSO}_4^-$ ion recognition

Umesh Fegade<sup>ab</sup>, Suban K. Sahoo<sup>c</sup>, Amanpreet Singh<sup>d</sup>, Pramod Mahulikar<sup>a</sup>, Sanjay Attarde<sup>b</sup>, Narinder Singh<sup>\*d</sup>, Anil Kuwar<sup>\*a</sup>

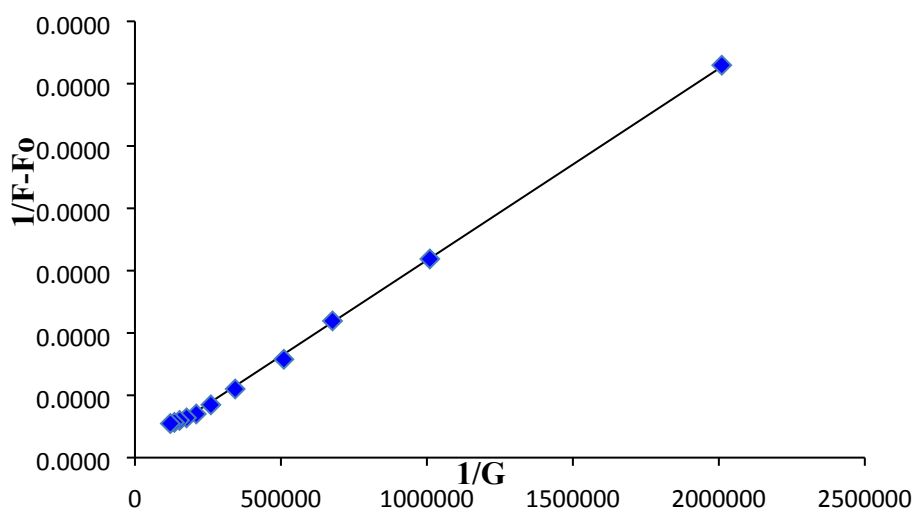

**Fig. S1.** Benesi-Hildebrand Plot of **L** (adjusted equation:  $1/F - F_0 = -3E-12 + 9E-08 \ 1/[G]$ ,  $R=0.999$ ) at the  $K$  value of  $3000 \text{ M}^{-1}$ .

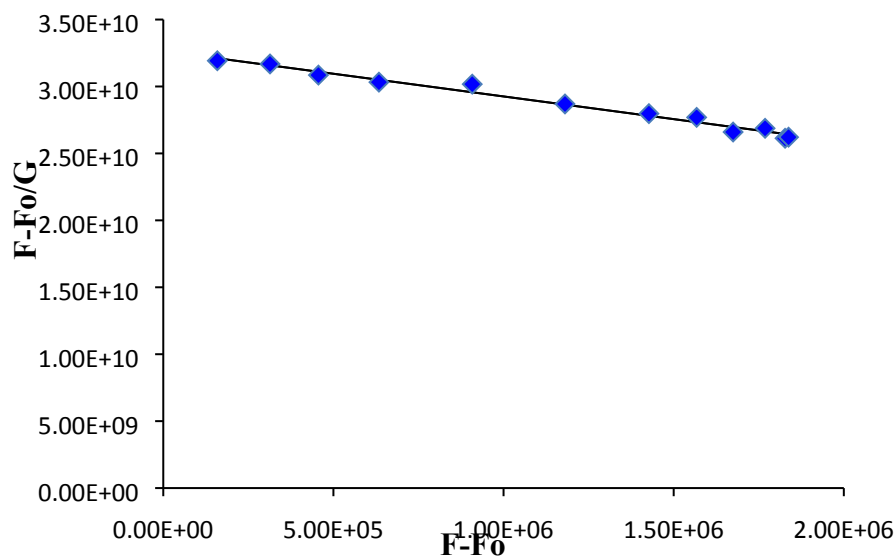

**Fig. S2.** Scatchard Plot for receptor **L** (adjusted equation:  $F - F_0/[G] = -3389x + 3E+10$ ,  $R=0.980$ ) at the  $K$  value  $3389 \text{ M}^{-1}$ .

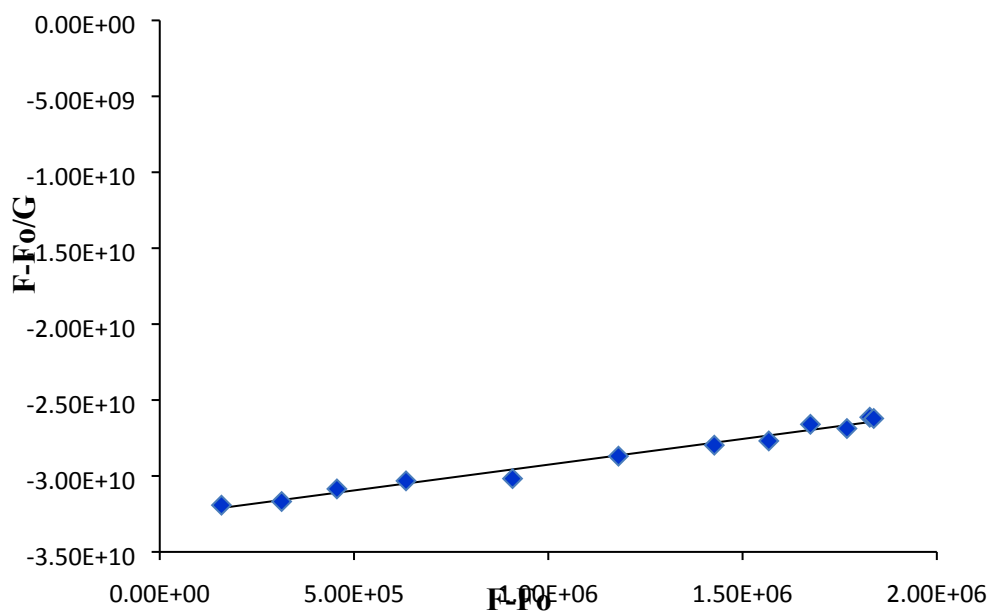

**Fig. S3.** Connor Plot for receptor **L** (adjusted equation:  $y = -3389x - 3E+10$ ,  $R=0.980$ ) at the  $K$  value  $3389 \text{ M}^{-1}$ .

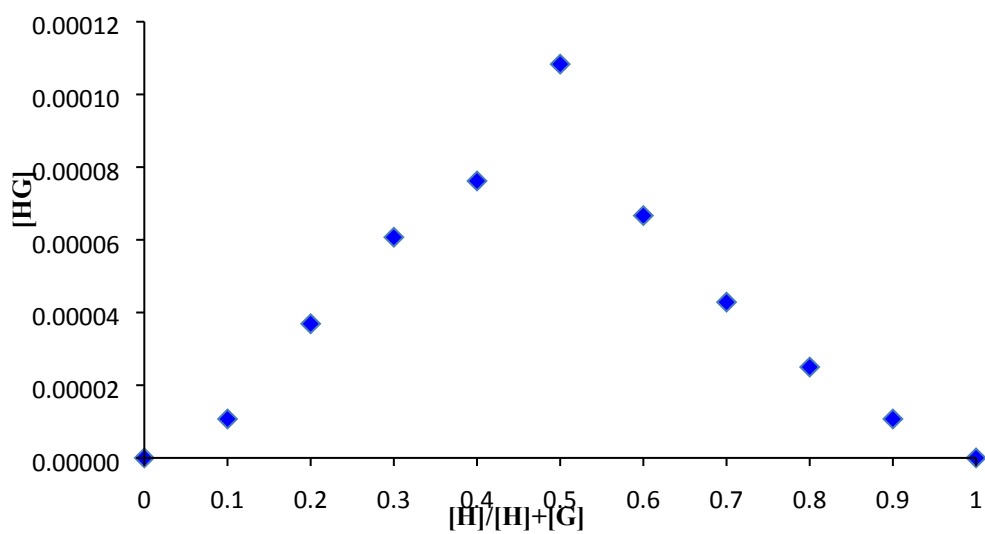

**Fig. S4.** The Job's plot for the receptor **L** and  $\text{HSO}_4^-$ .

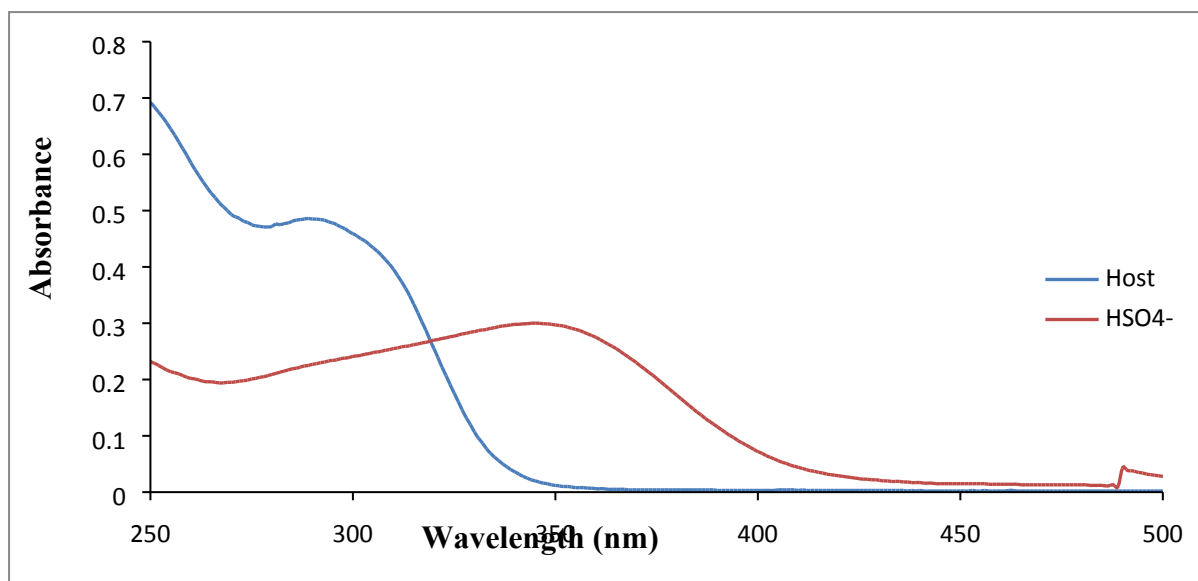

**Figure S5.** The absorption spectra of **L** ( $1 \times 10^{-5}$  M) in the absence and presence of  $\text{HSO}_4^-$  anion in 100% water (1 equiv. of each).

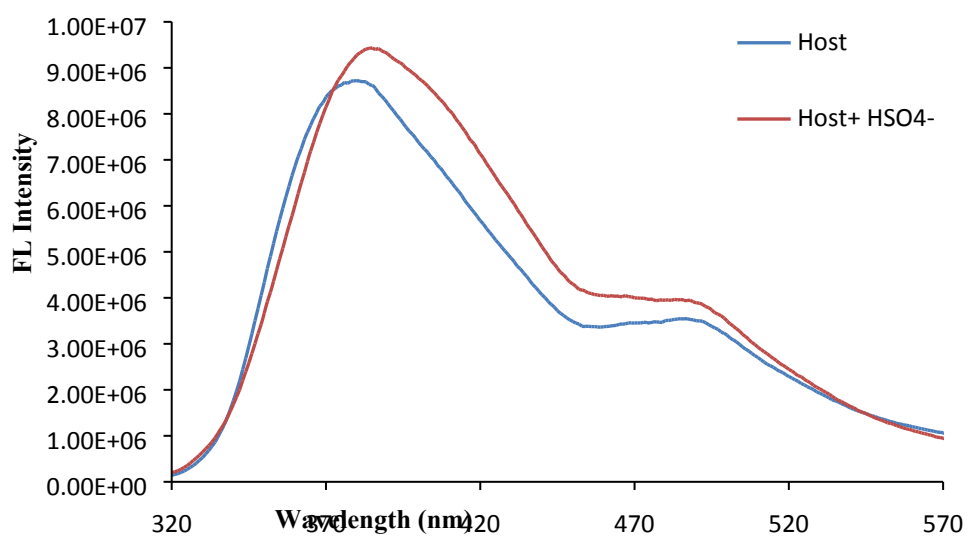

**Figure S6.** Changes in the fluorescence of **L** ( $1 \times 10^{-5}$  M) in the absence and presence of  $\text{HSO}_4^-$  anion in 100% water.
